# Supplementary material for: Phytocenosis biodiversity at various water levels in mesotrophic Lake Arakhley, Lake Baikal basin, Russia
Source: PeerJ. 2021 Jun 18;9:e11628. doi: 10.7717/peerj.11628 (PMC8216174; doi:10.7717/peerj.11628)
Supplement: Supplemental Information 1 [file peerj-09-11628-s001.xlsx]

## Sheet: Лист1
	T, °С		рН		ORP		EC		TDS		DOC		TURB		Sal		Cl-		SO42-		НСО3-		Na+		K+		Mg2+		Ca2+		Fe		Zn		Mn		Pb		Ni		Cd		Cr
	surface	bottom	surface	bottom	surface	bottom	surface	bottom	surface	bottom	surface	bottom	surface	bottom	surface	bottom	surface	bottom	surface	bottom	surface	bottom	surface	bottom	surface	bottom	surface	bottom	surface	bottom	surface	bottom	surface	bottom	surface	bottom	surface	bottom	surface	bottom	surface	bottom	surface	bottom
	7.5	9.2	7.53	7.5	175	121	215	201	141	140	12.1	9.8	29.4	29	0.1	0.1	2.6	2.7	1.1	1	143.7	144.5	16	16.5	3.35	3.4	7.6	7.5	20.1	21	0.005	0.01	0.0005	0.0024	˂ 0.001	0.961	˂ 0.001	0.0011	˂ 0.001	˂ 0.001	˂ 0.0001	˂ 0.0001	˂ 0.001	˂ 0.001
	7.5	9.4	7.82	7.8	189	120	218	215	197	185	12.4	9.5	30.2	29.8	0.1	0.1	2.3	2.5	1.2	1	140.3	141.2	15.4	16.1	3.29	3.33	7.5	7.4	20.1	21.1	0.007	0.1	0.0008	0.0054	˂ 0.001	0.969	˂ 0.001	0.0015	˂ 0.001	˂ 0.001	˂ 0.0001	˂ 0.0001	˂ 0.001	˂ 0.001
	7.7	9.4	7.96	7.78	178	112	219	212	145	143	12.1	10.1	34.1	34	0.1	0.1	2.6	3	1.1	1.1	143.1	143.1	15.5	15.4	3.33	3.4	7.4	7.1	20.2	21.1	0.007	0.009	0.0001	0.0015	˂ 0.001	0.711	˂ 0.001	0.0016	˂ 0.001	˂ 0.001	˂ 0.0001	˂ 0.0001	˂ 0.001	˂ 0.001
	6.7	9.5	6.38	7.21	180	177	218	209	148	137	12.3	9.4	35.2	35	0.1	0.1	2.9	3.1	1.3	1.2	136.6	144.6	15.7	16	3.48	3.5	5.9	5.9	19.4	20	0.009	0.016	0.0005	0.0028	˂ 0.001	0.99	˂ 0.001	0.0017	˂ 0.001	˂ 0.001	˂ 0.0001	˂ 0.0001	˂ 0.001	˂ 0.001
	6.8	9	7.14	7.29	179	173	209	205	137	131	13.2	8.8	30.5	29.5	0.11	0.1	2.8	2.9	1.1	1.1	140.5	142.1	10.8	16.4	3.59	3.6	5.3	5.3	19.3	20.4	0.005	0.011	0.0006	0.0054	˂ 0.001	0.884	˂ 0.001	0.0014	˂ 0.001	˂ 0.001	˂ 0.0001	˂ 0.0001	˂ 0.001	˂ 0.001
	6.9	6.2	7.34	7.36	184	169	215	207	135	122	14	12.7	32.3	32	0.1	0.1	2.8	3	1.3	1	131.8	146	15.9	16.7	3.36	3.41	7.3	7.1	20.5	21.5	0.001	0.009	0.0005	0.0048	˂ 0.001	0.898	˂ 0.001	0.0011	˂ 0.001	˂ 0.001	˂ 0.0001	˂ 0.0001	˂ 0.001	˂ 0.001
	10.9	9.3	7.89	7.85	187	191	223	212	154	145	10.5	10.2	32.4	31.9	0.12	0.1	2.8	3	1	1	131.8	141.5	15	16.1	3.25	3.34	8	7.8	20.2	20.8	0.004	0.009	0.0008	0.0008	˂ 0.001	0.898	˂ 0.001	0.0019	˂ 0.001	˂ 0.001	˂ 0.0001	˂ 0.0001	˂ 0.001	˂ 0.001
	10.3	9.1	7.82	7.84	186	182	224	215	144	135	10.5	10	30.3	30	0.11	0.1	2.7	2.9	1.1	0.8	133	133.9	14.8	16.4	3.28	3.32	7.4	7.2	20.3	21.1	0.004	0.008	0.0009	0.0009	˂ 0.001	0.674	˂ 0.001	0.0018	˂ 0.001	˂ 0.001	˂ 0.0001	˂ 0.0001	˂ 0.001	˂ 0.001
	10.8	9.2	7.94	7.81	214	198	234	222	155	147	10.5	9.5	30.1	29.8	0.11	0.11	2.7	3	1.3	1.2	136	138.4	17.1	18.2	3.36	3.44	7.5	7.4	21.1	22.7	0.001	0.012	0.0008	0.0008	˂ 0.001	0.952	˂ 0.001	0.0016	˂ 0.001	˂ 0.001	˂ 0.0001	˂ 0.0001	˂ 0.001	˂ 0.001
	21.1	6.3	8.12	8.17	300	298	267	270	180	172	9.4	6.2	42.5	42.1	0.11	0.11	1.4	1.7	1	1	130.4	145.1	17.7	18.1	3.28	3.34	7.6	7.5	20.5	21.5	0.008	0.015	0.0009	0.0009	˂ 0.001	0.944	˂ 0.001	0.0021	˂ 0.001	˂ 0.001	˂ 0.0001	˂ 0.0001	˂ 0.001	˂ 0.001
	20	6.1	8.06	8.1	308	286	254	252	168	168	9.4	7	45.4	45.4	0.12	0.12	1.5	1.6	1	1	138.9	140.2	18.1	19.7	3.87	3.9	8	8	20.2	21.4	0.007	0.012	0.0001	0.0087	˂ 0.001	0.994	˂ 0.001	0.0015	˂ 0.001	˂ 0.001	˂ 0.0001	˂ 0.0001	˂ 0.001	˂ 0.001
	19.9	6.5	8.01	8.24	299	280	240	247	169	157	9.4	5.5	44.1	44	0.12	0.11	1.4	1.5	1.1	1.1	134.1	140.5	18.2	19.5	3.21	3.22	7.6	7.7	20.1	21.3	0.006	0.015	0.0005	0.0119	˂ 0.001	0.615	˂ 0.001	0.0026	˂ 0.001	˂ 0.001	˂ 0.0001	˂ 0.0001	˂ 0.001	˂ 0.001
	19.2	6.3	8.57	8.58	265	247	248	249	160	147	9.6	5.5	40.2	39	0.12	0.12	1.3	1.4	1	1	137.9	140.1	17.9	18.9	3.9	4.11	8.2	8.4	20.4	21.5	0.002	0.014	0.0007	0.0007	˂ 0.001	0.922	˂ 0.001	0.0048	˂ 0.001	˂ 0.001	˂ 0.0001	˂ 0.0001	˂ 0.001	˂ 0.001
	19	6.4	8.48	8.5	268	254	250	248	161	140	9.5	6	45.7	45.2	0.12	0.12	1.6	1.8	1.2	1	135.4	147.5	16	16.4	3.78	4	7.6	7.9	20.1	21.4	0.007	0.018	0.0008	0.0008	˂ 0.001	0.992	˂ 0.001	0.0016	˂ 0.001	˂ 0.001	˂ 0.0001	˂ 0.0001	˂ 0.001	˂ 0.001
	18.9	6.6	8.48	8.48	269	256	246	240	161	144	9.4	7.6	44.3	44	0.12	0.12	1.8	1.8	1.3	0.8	134.8	140.4	14.3	15.4	3.75	3.94	6.8	6.7	20.8	21.2	0.006	0.015	0.0001	0.0016	˂ 0.001	0.994	˂ 0.001	0.0015	˂ 0.001	˂ 0.001	˂ 0.0001	˂ 0.0001	˂ 0.001	˂ 0.001
	19.1	10.5	8.14	8.15	278	261	240	250	164	157	8.5	5.9	43	42.8	0.12	0.11	1.6	1.7	1.2	1.2	133.9	141	13.4	15.1	3.59	4	6.3	6.5	20.2	21.8	0.008	0.018	0.0001	0.0018	˂ 0.001	0.665	˂ 0.001	0.0019	˂ 0.001	˂ 0.001	˂ 0.0001	˂ 0.0001	˂ 0.001	˂ 0.001
	19.3	10.3	8.22	8.23	300	273	252	264	178	169	9	6.2	44.6	45.4	0.11	0.1	1.4	1.5	1.2	1	144.8	144.8	13.5	15.7	3.55	3.67	6.1	6.4	18.3	19.4	0.005	0.017	0.0001	0.0054	˂ 0.001	0.988	˂ 0.001	0.0017	˂ 0.001	˂ 0.001	˂ 0.0001	˂ 0.0001	˂ 0.001	˂ 0.001
	8.9	10.5	7.94	7.48	196	194	237	222	144	143	11.9	11.6	34.2	36.8	0.1	0.11	1.5	1.7	1.2	1	141.2	141.2	13.8	14.2	3.69	3.71	6.2	6.4	18.6	19.4	0.003	0.018	0.0012	0.0037	˂ 0.001	0.888	˂ 0.001	0.0015	˂ 0.001	˂ 0.001	˂ 0.0001	˂ 0.0001	˂ 0.001	˂ 0.001
	8.8	6.2	7.84	7.52	189	180	225	220	140	128	14	12	32.1	32.5	0.1	0.1	1.6	1.6	1	1	137.4	145.7	15.3	16.1	3.88	3.92	6.8	6.7	18.8	19.9	0.003	0.029	0.0019	0.0024	˂ 0.001	0.972	˂ 0.001	0.0016	˂ 0.001	˂ 0.001	˂ 0.0001	˂ 0.0001	˂ 0.001	˂ 0.001
	8.9	11.1	7.96	7.95	180	182	230	221	144	140	14.5	10.5	34.2	34	0.1	0.1	1.5	1.6	1.3	1.1	132.9	146.1	15.1	16	3.78	3.57	6.5	6.3	20.2	20.9	0.008	0.027	0.0014	0.0085	˂ 0.001	0.691	˂ 0.001	0.0011	˂ 0.001	˂ 0.001	˂ 0.0001	˂ 0.0001	˂ 0.001	˂ 0.001
	8.7	11.5	7.77	7.21	170	170	220	219	142	141	13.8	8.4	33.1	33.5	0.1	0.1	2.8	2.9	1.2	1	131	149.7	15.1	16.8	3.78	3.77	6.3	6.1	20.9	21.9	0.007	0.024	0.0018	0.0088	˂ 0.001	0.567	˂ 0.001	0.001	˂ 0.001	˂ 0.001	˂ 0.0001	˂ 0.0001	˂ 0.001	˂ 0.001
	8.9	11.4	7.2	7.2	179	173	218	217	138	137	12.4	8.5	34.5	34.5	0.11	0.1	2.07619	2.23333	1.15238	1.02857	136.643	142.743	15.4571	16.6524	3.54048	3.61381	7.04286	7.01429	20.0143	21.0143	0.00538095	0.0193333	0.000719048	0.00380952		0.86519		0.00174286
	8.7	10.7	7.34	7.24	171	154	217	215	136	138	12	8.8	34.4	34.8	0.12	0.11	0.627618	0.668082	0.112335	0.10556	4.35116	3.52769	1.78622	1.43896	0.238526	0.27509	0.794085	0.785039	0.734361	0.81565	0.00237647	0.0193658	0.000523086	0.00330059		0.143797		0.000790298
	8.5	11	7.91	7.86	178	160	212	200	135	138	12.3	11	33	33.4	0.1	0.11	0.136958	0.145787	0.0245134	0.023035	0.9495	0.769804	0.389785	0.314008	0.0520507	0.0600297	0.173284	0.171309	0.160251	0.17799	0.000518589	0.00422596	0.000114147	0.000720248		0.031379		0.000172457
	12.2083	8.82083	7.8275	7.80625	217.583	200.458	230.458	226.333	153.167	146	11.3625	8.77917	36.2417	36.1833	0.109167	0.106087	0.431882	0.459726	0.0773006	0.0726387	2.99416	2.4275	1.22915	0.990192	0.164137	0.189298	0.546433	0.540207	0.505334	0.561272	0.00163532	0.0133261	0.00035995	0.00227123		0.0989505		0.000543827
	5.43378	1.94399	0.485783	0.438017	51.0029	55.0983	15.9018	20.4826	16.4942	14.9579	1.82681	2.13582	5.70262	5.73522	0.00880547	0.0076967	2.08±0.43	2.23±0.46	1.15±0.08	1.02±0.07	136.64±3.15	142.74±2.43	15.46±1.23	16.65±0.99	3.5±0.16	3.6±0.19	7.04±0.55	7.01±0.54	20.01±0.51	21.01±0.56	0.005±0.002	0.019±0.013	0.0007±0.0004	0.0038±0.0023		0.865±0.099		0.0017±0.0005
	1.10917	0.396816	0.09916	0.0894099	10.4109	11.2469	3.24594	4.18099	3.36686	3.05327	0.372896	0.435972	1.16404	1.1707	0.00179741	0.00157108
2.06866	2.29449	0.820877	0.205128	0.184959	21.5366	23.266	6.71475	8.64904	6.96488	6.31617	0.771393	0.901877	2.40801	2.42177	0.00371822	0.00325003						3.1534
